# Supplementary material
Source: PubMed Central journal article supplement (PMC5730482)
Supplement: NIHMS917699-supplement-1.pdf [file NIHMS917699-supplement-1.pdf]

## SUPPLEMENTAL INFORMATION

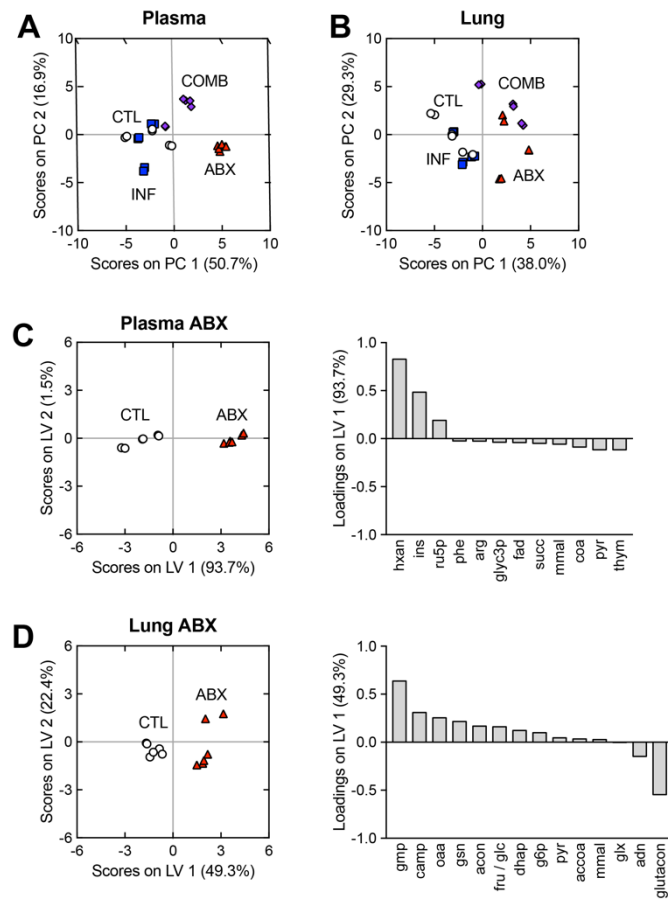

**Figure S1. Antibiotic treatment systemically alters host metabolites; related to Figure 1.**

(A) PCA projection of metabolomic profiles from plasma samples of all 4 treatment groups: control (CTL), antibiotic treated (ABX), infection (INF) or combination treatment (COMB).

(B) PCA projection of metabolomic profiles from lung samples of all 4 treatment groups.

(C) PLS-DA of plasma samples from ABX mice.

(D) PLS-DA of lung samples from ABX mice. Metabolites selected by elastic net regularization were enriched for carbohydrate metabolism intermediates.

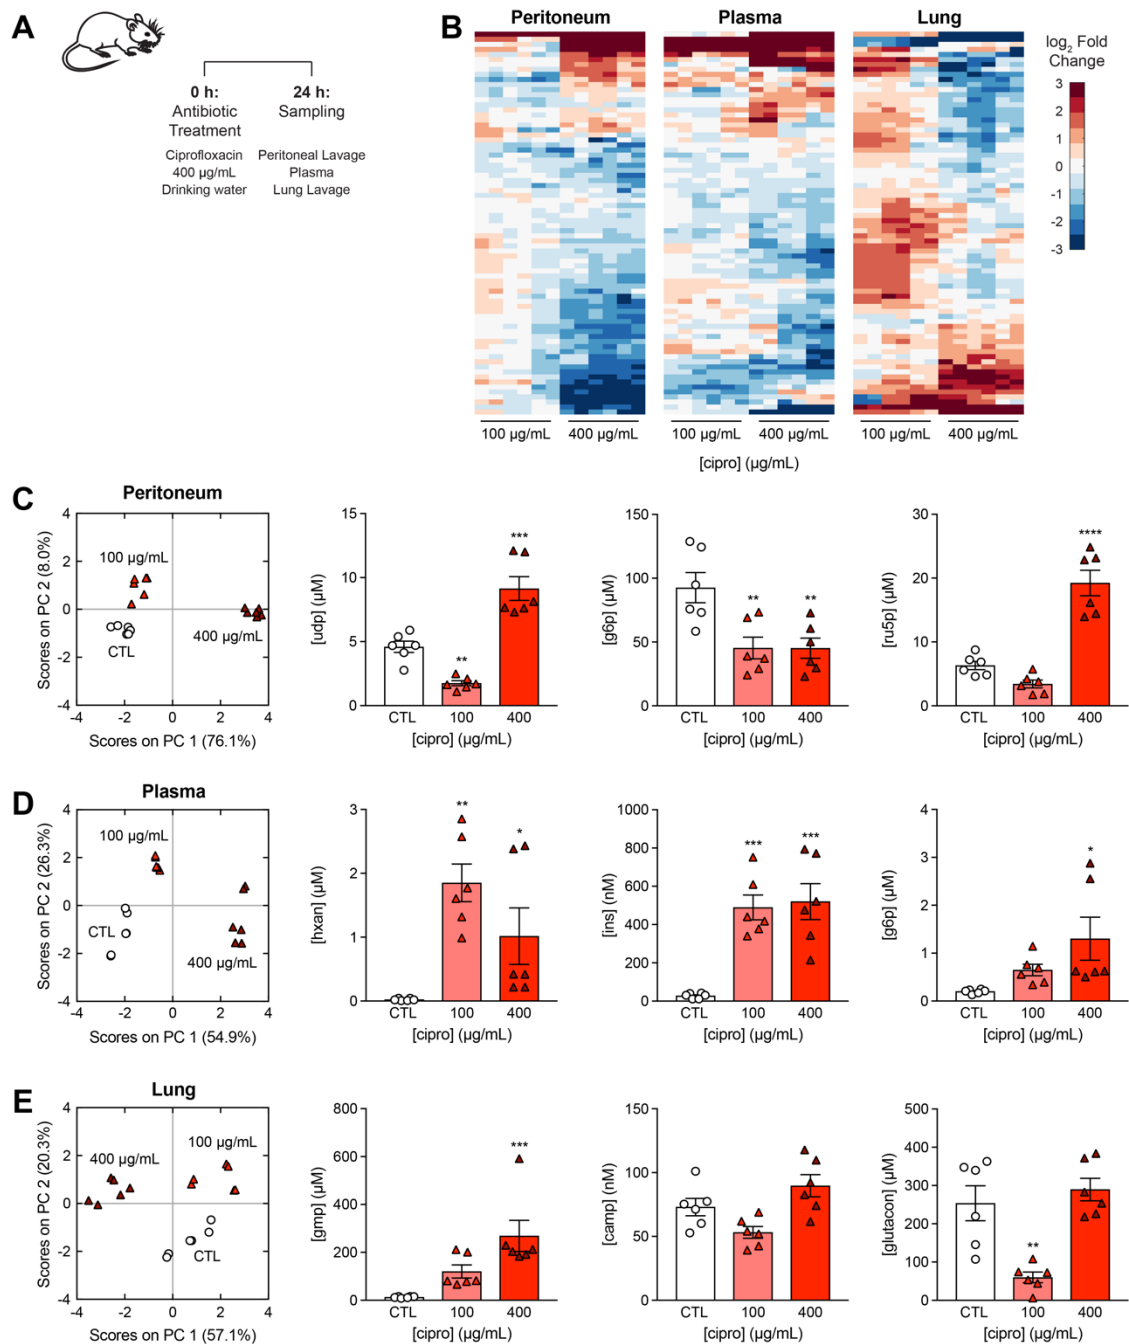

**Figure S2. Antibiotic treatment elicits dose-dependent changes to host metabolites; related to Figure 1.**

- (A) Experimental design for metabolomic profiling. Conventional mice were subjected to antibiotic treatment with 400 µg/mL cipro and sampled 24 h later.
- (B) Hierarchically clustered heatmaps for changes in metabolite concentrations between antibiotic treated and control mice at 100 and 400 µg/mL cipro, by tissue sampled.
- (C) PCA projection of metabolomic profiles from control (CTL) and antibiotic treated mice in the peritoneum.
- (D) PCA projection of metabolomic profiles from control (CTL) and antibiotic treated mice in the plasma.
- (E) PCA projection of metabolomic profiles from control (CTL) and antibiotic treated mice in the lung.
- Data are represented as mean ± SEM from  $n = 3$  independent biological replicates. Significance reported as FDR-corrected p-values in comparison with corresponding CTL conditions: \*:  $p \leq 0.05$ , \*\*:  $p \leq 0.01$ , \*\*\*:  $p \leq 0.001$ , \*\*\*\*:  $p \leq 0.0001$ .

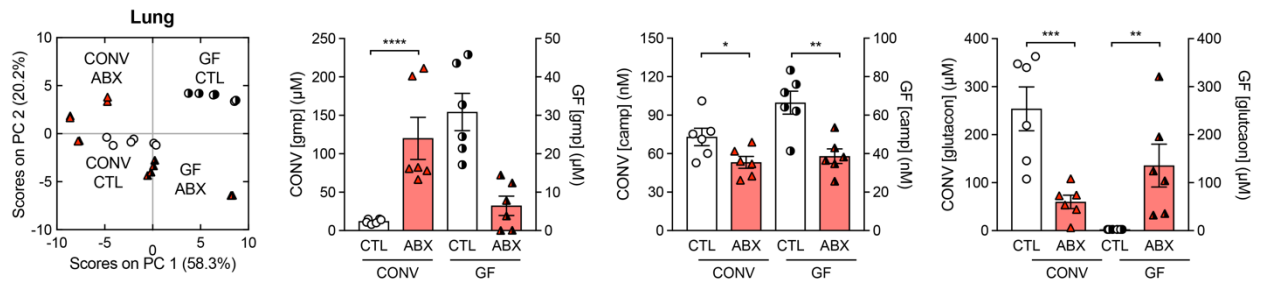

**Figure S3. Antibiotic treatment elicits microbiome-independent changes in host metabolites; related to Figure 2.** PCA projection of metabolomic profiles from control (CTL) and antibiotic treated (ABX) conventional (CONV) and germ-free (GF) mice in the lung (*left*). Concentrations for lung metabolites with large lung ABX LV1-loadings in CONV and GF mice (*right*). Data are represented as mean  $\pm$  SEM from  $n = 3$  independent biological replicates. Significance reported as FDR-corrected p-values in comparison with corresponding CTL conditions: \*:  $p \leq 0.05$ , \*\*:  $p \leq 0.01$ , \*\*\*:  $p \leq 0.001$ , \*\*\*\*:  $p \leq 0.0001$ .

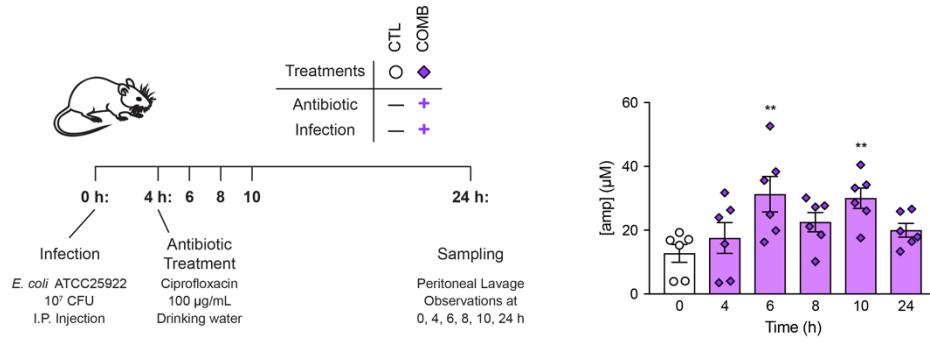

**Figure S4. Metabolites altered by antibiotic treatment during infection inhibit drug efficacy; related to Figure 3.** Peritoneal amp concentrations following antibiotic treatment. Conventional mice were subjected to antibiotic treatment with 100 µg/mL cipro and sampled at 4, 6, 8, 10 and 24 h. Data are represented as mean ± SEM from n = 3 independent biological replicates. Significance reported as p-values in comparison with corresponding CTL conditions: \*\*: p ≤ 0.01.

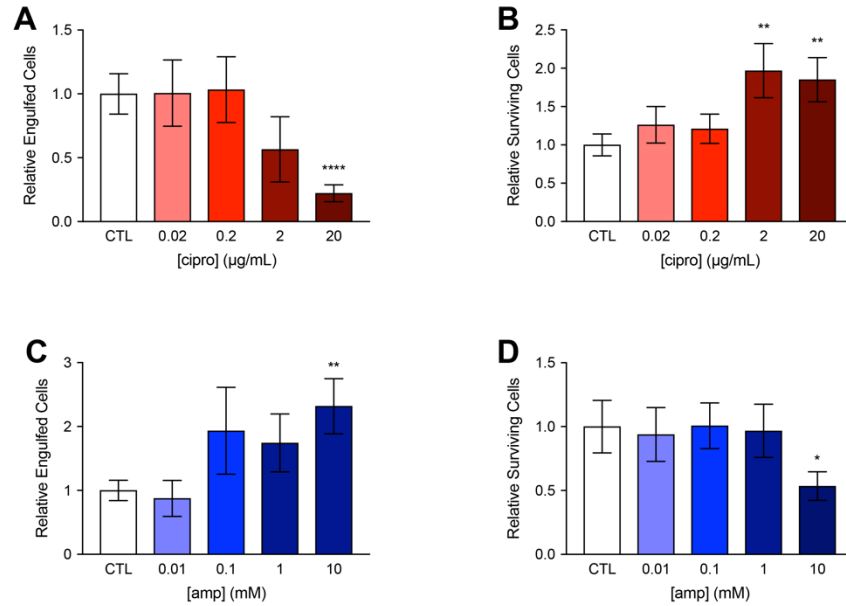

**Figure S5. Antibiotic treatment directly inhibits phagocytic killing by immune cells; related to Figure 5.**

(A) Pathogen engulfment by control (CTL) or macrophages treated with 0.2-20 µg/mL cipro.

(B) Pathogen survival by control or macrophages treated with 0.2-20 µg/mL cipro.

(C) Pathogen engulfment by control or macrophages treated with 0.01-10 mM amp.

(D) Pathogen survival by control or macrophages treated with 0.01-10 mM amp.

Data are represented as mean ± SEM from  $n \geq 3$  independent biological replicates. Significance reported as FDR-corrected p-values within the indicated comparisons: \*:  $p \leq 0.05$ , \*\*:  $p \leq 0.01$ , \*\*\*\*:  $p \leq 0.0001$ .
